# Supplementary material for: Characterization of a β-Adrenergic-Like Octopamine Receptor in the Oriental Fruit Fly, Bactrocera dorsalis (Hendel)
Source: MDPI journal article supplement (doi:10.3390/ijms17101577), 2016-09-22
Supplement: s1 [file s1]

# Supplementary Materials: Characterization of a $\beta$ -Adrenergic-like Octopamine Receptor in the Oriental Fruit Fly, *Bactrocera dorsalis* (Hendel)

Hui-Min Li, Hong-Bo Jiang, Shun-Hua Gui, Xiao-Qiang Liu, Hong Liu, Xue-Ping Lu, Guy Smagghe and Jin-Jun Wang

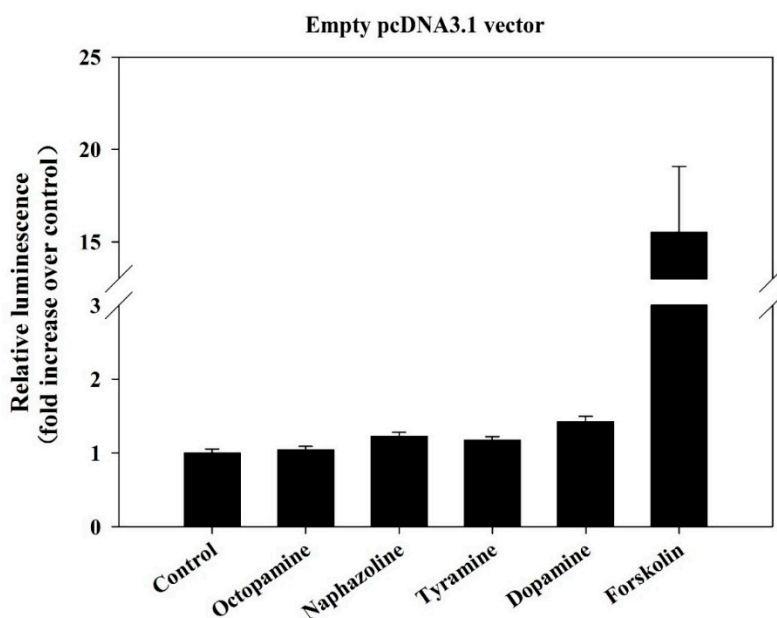

**Figure S1.** HEK-293 cells expressing empty pcDNA3.1 vector were challenged with indicated biogenic amines ( $1 \times 10^{-6}$  M) or with forskolin ( $10 \times 10^{-5}$  M) as a positive control. The negative control was Dulbecco's modified Eagle's medium (DMEM). Data represent means  $\pm$  standard deviation (S.E.) from 6 experiments.

**Table S1.** Median effective concentration ( $EC_{50}$ ) (mean  $\pm$  S.E.) for ligands on BdOct $\beta$ R1 in the agonist assay.

| Ligands      | $EC_{50}$ (M)                                   |
|--------------|-------------------------------------------------|
| Octopamine   | $9.11 \times 10^{-10} \pm 0.99 \times 10^{-10}$ |
| Naphazoline  | $6.35 \times 10^{-10} \pm 2.02 \times 10^{-10}$ |
| Tyramine     | $1.97 \times 10^{-8} \pm 0.52 \times 10^{-8}$   |
| Dopamine     | $3.32 \times 10^{-6} \pm 1.43 \times 10^{-6}$   |
| Phentolamine | $6.39 \times 10^{-3} \pm 2.30 \times 10^{-3}$   |

**Table S2.** Median inhibitory concentration ( $IC_{50}$ ) (mean  $\pm$  S.E.) for ligands on BdOct $\beta$ R1 in the antagonist assay.

| Ligands        | $IC_{50}$ (M)                                 |
|----------------|-----------------------------------------------|
| Mianserin      | $4.84 \times 10^{-7} \pm 1.12 \times 10^{-7}$ |
| Chlorpromazine | $2.66 \times 10^{-6} \pm 0.48 \times 10^{-6}$ |
| Phentolamine   | $3.80 \times 10^{-6} \pm 0.35 \times 10^{-6}$ |
